# Supplementary material for: Challenges of diagnosis and management of giant cell arteritis in general practice: a multimethods study
Source: PubMed Central journal article supplement — BMJ Open. 2018 Feb 3;8(2):e019320. doi: 10.1136/bmjopen-2017-019320 (PMC5829930; doi:10.1136/bmjopen-2017-019320), 2018-02-03
Supplement: bmjopen-2017-019320.draft_revisions.pdf [file bmjopen-2017-019320.draft_revisions.pdf]

# BMJ Open

BMJ Open is committed to open peer review. As part of this commitment we make the peer review history of every article we publish publicly available.

When an article is published we post the peer reviewers' comments and the authors' responses online. We also post the versions of the paper that were used during peer review. These are the versions that the peer review comments apply to.

The versions of the paper that follow are the versions that were submitted during the peer review process. They are not the versions of record or the final published versions. They should not be cited or distributed as the published version of this manuscript.

BMJ Open is an open access journal and the full, final, typeset and author-corrected version of record of the manuscript is available on our site with no access controls, subscription charges or pay-per-view fees (<http://bmjopen.bmj.com>).

If you have any questions on BMJ Open's open peer review process please email [editorial.bmjopen@bmj.com](mailto:editorial.bmjopen@bmj.com)

# BMJ Open

## Giant cell arteritis: Challenges of diagnosis and management in general practice.

|                                 |                                                                                                                                                                                                                                                                                                                                                                                                                                                                                                                        |
|---------------------------------|------------------------------------------------------------------------------------------------------------------------------------------------------------------------------------------------------------------------------------------------------------------------------------------------------------------------------------------------------------------------------------------------------------------------------------------------------------------------------------------------------------------------|
| Journal:                        | <i>BMJ Open</i>                                                                                                                                                                                                                                                                                                                                                                                                                                                                                                        |
| Manuscript ID                   | bmjopen-2017-019320                                                                                                                                                                                                                                                                                                                                                                                                                                                                                                    |
| Article Type:                   | Research                                                                                                                                                                                                                                                                                                                                                                                                                                                                                                               |
| Date Submitted by the Author:   | 25-Aug-2017                                                                                                                                                                                                                                                                                                                                                                                                                                                                                                            |
| Complete List of Authors:       | Helliwell, Toby; Keele University, Research Institute for Primary Care and Health Sciences<br>Muller, Sara; Keele University, Research Institute for Primary Care & Health Sciences<br>Hider, Samantha; Keele University, Arthritis Research UK Primary Care Centre;<br>Prior, James A.; Keele Univ, Research Institute for Primary Care and Health Sciences<br>Richardson, Jane; Keele University, Primary Care and Health Sciences<br>Mallen, Christian; Keele University, Arthritis Research UK Primary Care Centre |
| <b>Primary Subject Heading</b>: | General practice / Family practice                                                                                                                                                                                                                                                                                                                                                                                                                                                                                     |
| Secondary Subject Heading:      | Rheumatology, Medical management                                                                                                                                                                                                                                                                                                                                                                                                                                                                                       |
| Keywords:                       | PRIMARY CARE, RHEUMATOLOGY, GERIATRIC MEDICINE                                                                                                                                                                                                                                                                                                                                                                                                                                                                         |
|                                 |                                                                                                                                                                                                                                                                                                                                                                                                                                                                                                                        |

SCHOLARONE™  
Manuscripts

Only

**Giant cell arteritis: Challenges of diagnosis and management in general practice.**

1Toby Helliwell PhD, 1Sara Muller PhD, 1,2 Samantha L Hider PhD, 1 James A Prior PhD, 1 Jane C Richardson PhD, 1 Christian D Mallen PhD

1Arthritis Research UK Primary Care Centre, Primary Care Sciences, Keele University, Keele Staffordshire ST5 5BG

2Rheumatology Department, Haywood Rheumatology Centre, Staffordshire ST6 7AG

**Address for correspondence:**

Dr Toby Helliwell. Arthritis Research UK Primary Care Centre, Primary Care Sciences, Keele University, Keele Staffordshire ST5 5BG.

Email address: t.helliwell@keele.ac.uk

**Funding:** This work was funded by an Arthritis Research UK Clinician Scientist Award awarded to Christian Mallen (19634). CDM is funded by the National Institute for Health Research (NIHR), Collaborations for Leadership in Applied Health Research and Care West Midlands, the NIHR School for Primary Care Research and a NIHR Research Professorship in General Practice (NIHR-RP-2014-04-026). TH is funded by a NIHR Clinical Lectureship in General Practice. SM is funded by the NIHR School for Primary Care Research. JAP is funded by a Launching Fellowship from the NIHR School for Primary Care Research. The views expressed are those of the author(s) and not necessarily those of the NHS, the NIHR or the Department of Health.

**Data sharing statement:** The datasets analysed during the current study may be available from the corresponding author on reasonable request.

**Keywords:** Giant cell arteritis, general practice, diagnosis, management

**Conflicts of interest:** There are no conflicts of interest to declare.

**Prior presentation:** Presented as a poster at BSR Conference 2015

Word count: 3823

Number of tables: 4

1  
2  
3  
4  
5  
6  
7 Background: In the UK, general practitioners (GPs) are usually the first medical contact for  
8 patients with suspected giant cell arteritis (GCA). Whilst rare, it is critical not to miss, as  
9 delayed treatment can lead to significant complications including permanent visual loss. To  
10 date little is known about the approach and challenges to diagnosis and management of GCA  
11 by GPs.  
12  
13  
14  
15  
16  
17  
18  
19

20 Objective: To investigate the diagnosis and management of patients with suspected GCA in  
21 UK general practice.  
22  
23  
24

25 Design and participants: A multi-methods approach was taken, comprising a postal survey of  
26 5000 randomly selected UK GPs and semi-structured telephone interviews of 24 GPs from  
27 across the UK.  
28  
29  
30  
31  
32

33 Setting: UK general practice  
34  
35

36 Results: 1249 questionnaires were returned. 879 responders (70%) indicated that they had  
37 diagnosed and managed a patient with GCA. A variety of clinical features were used to  
38 identify GCA. 21.9% suggested that they would exclude GCA as a diagnosis if headache was  
39 absent and less than half of GPs routinely initiate glucocorticoid treatment prior to referral.  
40 Significant regional variations in referral pathways were reported. Thematic analysis of  
41 interview transcripts highlighted fears relating to a missed diagnosis of GCA and the non-  
42 specific nature of early GCA presentation. Accessing specialist care was highlighted as  
43 challenging by many GPs and that a national standard fast track pathway is lacking to  
44 support this patient group. Additionally there were significant concerns regarding potential  
45 adverse effects relating to long term treatment with glucocorticoids.  
46  
47  
48  
49  
50  
51  
52  
53  
54  
55  
56  
57  
58  
59  
60

1  
2  
3 Conclusion: GPs over-rely on headache to identify GCA and marked geographical differences  
4  
5 in management, with conflicting referral pathways and difficulties in accessing appropriate  
6  
7 services exist in the UK. A national standard for fast-tracking suspected GCA patients to  
8  
9 relevant specialists would be beneficial to improve care and outcomes for patients with GCA.  
10  
11  
12  
13  
14  
15  
16  
17  
18  
19

### Strengths

1. Multi-methods approach, allowing the identification of significant challenges relating to GCA management in primary care and subsequent in depth exploration of those issues.
2. First large study to investigate diagnosis and management of GCA in general practice

### Limitations

1. Sub-optimal response rate and therefore potential lack of generalisability to findings although responder demographics of the questionnaire study relating to age, gender and GP role were comparable to national GP demographics.
2. Telephone interviews often viewed as inferior to face to face interviews for qualitative studies
3. There is the potential for discrepancies between reported behaviour and actual behaviour, this is inherent in both survey and interview studies

## Background

Giant cell arteritis (GCA) is the most common large/medium vessel vasculitis<sup>1</sup>. It is strongly associated with polymyalgia rheumatica (PMR) with an estimated incidence of 1.0 per 10000 patient years<sup>2</sup>. Barraclough (2012) estimated that a full-time general practitioner (GP) will see one new case of GCA every 1-2 years, although this will greatly depend on practice population demographics<sup>3</sup>.

Classical presenting features of GCA include new onset headache or head pain (which may be unilateral and often temporal), scalp tenderness, jaw and tongue claudication, constitutional and visual symptoms<sup>1</sup>. Usually there is a significant inflammatory response with raised inflammatory markers. However, it can present atypically which may lead to delays in diagnosis and potentially irreversible complications such as sight loss<sup>4</sup>. Once GCA is suspected, treatment with high dose glucocorticoids (often prednisolone in the UK) should be initiated along with early specialist referral to confirm diagnosis and prevent potential disease complications<sup>1</sup>.

Suspected GCA patients are usually identified clinically, followed by specialist referral for temporal artery biopsy (TAB) to confirm diagnosis. Ultrasound scanning however has been shown to be a useful and non-invasive tool to help diagnose GCA<sup>5</sup>. However, the sensitivity of TAB can vary with 13% to 19% of patients with typical features of GCA having a negative temporal artery biopsy<sup>6</sup>.

In the UK, GPs are the first point of medical contact for most patients. The role of the GP involves maintaining a high index of suspicion for the disorder, to initiate early therapy and

1  
2  
3 urgently refer to an appropriate specialist for diagnostic confirmation <sup>1</sup>. Following diagnosis,  
4  
5 GPs are often key in tapering glucocorticoid treatment as well as monitoring and  
6  
7 management of glucocorticoid related adverse effects and impact on co-morbidity for  
8  
9 example osteoporosis, cardiovascular disease, diabetes and development of serious  
10  
11 infections <sup>2,7</sup>.  
12  
13

14  
15 The aim of this study was to investigate the diagnostic challenges and initial and on-going  
16  
17 management of GCA patients by GPs in the UK.  
18  
19  
20  
21  
22  
23

## 24 **Materials and Methods**

25  
26  
27 Given the potential variation in management practices due to multiple influences, such as  
28  
29 patient presentation, multi-morbidity, availability of services and variations in practice and  
30  
31 local policy, a multi-methods approach was chosen to produce a more complete description  
32  
33 of current GP practice <sup>8</sup>. First, a national cross-sectional postal survey of 5000 randomly  
34  
35 selected UK GPs was undertaken, followed by a semi-structured telephone interview study  
36  
37 with a purposive sample of survey responders to investigate in depth the challenges of  
38  
39 diagnosis and management associated with GCA. The cross-sectional postal survey was  
40  
41 undertaken first, with the findings used to help develop the topic guide for the interview  
42  
43 study.  
44  
45  
46  
47  
48  
49  
50  
51  
52

53 PMR national cross sectional postal questionnaire survey. A cross sectional survey was  
54  
55 mailed to a random sample of 5000 GPs from across the UK identified from the Binley's  
56  
57 database. The Binley's database contains the names and addresses of the majority of GPs  
58  
59  
60

1  
2  
3 working in the UK. It also contains other forms of information including the type of practice,  
4  
5 the practice population size, practitioner seniority, and some of the clinical services  
6  
7 provided<sup>9</sup>. An online option for survey completion was also available through Survey  
8  
9 Monkey<sup>10</sup>. Non-responders were sent a reminder card after 2 weeks and a further survey  
10  
11 pack after 4 weeks. The survey was closed 6 weeks after the second survey pack was sent.  
12  
13

14  
15 No standard survey instrument exists for assessing diagnosis and management of GCA by  
16  
17 GPs and so questions were specifically developed using current literature and guidelines for  
18  
19 GCA<sup>1</sup>. Questions related to how diagnosis was made (signs and symptoms) and how the GP  
20  
21 managed patients with suspected GCA. A mixture of open and closed response questions  
22  
23 were used. The questionnaire was piloted amongst GPs, rheumatologists and patients.  
24  
25  
26

27  
28 Descriptive statistics were generated (mean, standard deviation (SD) and interquartile range  
29  
30 (IQR)) using the statistical analysis package SPSS 22 for closed response questions<sup>11</sup>. For  
31  
32 open response questions a thematic content analysis was used<sup>12</sup>.  
33  
34  
35  
36  
37  
38

39 The interview study. Participants in the interview study were purposively sampled from  
40  
41 responders to the GP survey who had agreed to further contact. To reflect as broad a range  
42  
43 of practitioner experience as possible, sampling was based on clinical experience, gender  
44  
45 and clinical seniority. The qualitative interview study topic guide which was used as a guide  
46  
47 for topics to discuss, was informed by findings from the cross-sectional survey and relevant  
48  
49 GCA literature. The topic guide was reviewed and refined with feedback from GPs,  
50  
51 rheumatologists and qualitative researchers. As transcripts were reviewed, the topic guide  
52  
53 was modified to focus on themes identified from early interviews. The topic guide was  
54  
55  
56  
57  
58  
59  
60



1  
2  
3 piloted with two GPs and refined within the research team. These interviews were not  
4  
5 included in the data analysis.  
6  
7

8 Interviews were audio recorded and transcribed verbatim using an approved transcription  
9  
10 company<sup>13</sup>. The resulting transcripts were screened to remove any identifying information.  
11  
12 Thematic analysis, as described by Braun and Clarke, was used to analyse resulting transcript  
13  
14 data<sup>14</sup>. Analysis of the transcripts was managed using NVivo (NVivo10)<sup>15</sup>. TH performed the  
15  
16 analysis and an inter-rater exercise was undertaken in which three other researchers (SM,  
17  
18 SH, JR) were asked to independently analyse and identify general themes relating to a  
19  
20 randomly selected interview to compare with findings by TH. No changes resulted from this  
21  
22 exercise. Ethical approval for both studies was granted by the Keele University ethics review  
23  
24 panel (qualitative study ERP178, survey ERP2206).  
25  
26  
27  
28  
29  
30  
31  
32  
33

### 34 **Results**

35  
36 1249 (25%) completed questionnaires were received and analysed. 879 (70%) GPs had  
37  
38 indicated that they had managed a patient with GCA. Responders to the survey had a mean  
39  
40 age of 44 years (SD 9.25) and a mean of 13.5 years since qualifying as a GP. 52% were female  
41  
42 and the majority were partners (74%), with salaried (21%) and locum GPs (3%) comprising  
43  
44 the remainder. For the qualitative study, 24 GP participants were telephone interviewed  
45  
46  
47 from various regions across the UK. 16 participants were female and 15 participants were GP  
48  
49 partners  
50  
51  
52  
53  
54  
55  
56  
57  
58  
59  
60

1  
2  
3 Questionnaire survey: Initial diagnosis and management  
4  
5

6 Free text open response questions in the questionnaire were used to ask all participants to  
7  
8 describe how they made a diagnosis of GCA. The results summarised in Table 1.  
9  
10

11 **Table 1**  
12

13  
14 The predominant reported clinical feature used to diagnose GCA was headache, along with  
15  
16 visual disturbance and scalp tenderness. Survey responders indicated that they often used a  
17  
18 combination of features when making a new diagnosis. Of particular note however, was that  
19  
20 21.9% of responders indicated that they only use headache to identify GCA.  
21  
22

23  
24 Management of GCA can be divided into i) initial treatment and referral and ii) long term  
25  
26 glucocorticoid reduction and monitoring. For GPs, initial management is intimately  
27  
28 associated with diagnosis as suspected GCA patients require urgent specialist referral for  
29  
30 definitive diagnosis and treatment. Table 2 summarises the immediate subsequent actions  
31  
32 of GPs who have identified patients with suspected GCA.  
33  
34  
35  
36

37 **Table 2**  
38  
39  
40  
41  
42  
43

44 Guidance advises that treatment should not be delayed and that appropriate urgent referral  
45  
46 for specialist diagnostic confirmation should be made<sup>1</sup>. 445 responders to the survey  
47  
48 (35.6%) indicated that they would not routinely initiate treatment prior to referral. However,  
49  
50 78.7% (n=983) reported that if they were to initiate treatment, appropriate doses of  
51  
52 between 40 and 60mg of prednisolone would be prescribed. GP responders indicated that  
53  
54 they were referring suspected GCA patients to a variety of different specialities using an  
55  
56  
57  
58  
59  
60

1  
2  
3 assortment of referral pathways, depending on the geographical location in the UK. Table 3  
4  
5 summarises to which speciality survey responders refer suspected GCA patients.  
6  
7

8 **Table 3**  
9

10  
11  
12  
13  
14  
15  
16  
17  
18 Themes identified from the qualitative study  
19

20  
21 **Diagnosis**  
22

23  
24 The two main themes identified from the interview study related firstly to the presenting  
25  
26 features of GCA and secondly to fears of missing a diagnosis of GCA.  
27  
28

29  
30  
31  
32  
33 Presenting features of GCA  
34

35  
36 When asked about GCA symptoms in the interviews, participants often gave textbook  
37  
38 descriptions of classical features of GCA.  
39

40  
41  
42 *“Headache in someone over 55 you think giant cell arteritis really, that’s my mantra,*  
43  
44 *new different headache, classically unilateral but not always, focused around the*  
45  
46 *temple, potentially some tenderness there, possibly protruding temporal artery,*  
47  
48 *classically tender when they’re combing their hair, but also looking for things like*  
49  
50 *jaw claudication or tongue symptoms, [.....] and obviously the dread of visual*  
51  
52 *disturbance as well really which can be anything really”*  
53  
54

55  
56  
57 **GP6 (20, F, P)**  
58  
59  
60

1  
2  
3 Key: GP identifier [time qualified as a GP (years), gender (male/female), seniority/role  
4  
5 (S:salaried, L:locum, P:partner, SP: senior partner)]  
6  
7  
8  
9  
10

11  
12  
13  
14  
15 While textbook descriptions of classical GCA were given, there was recognition that some of  
16  
17 these features may be difficult to recognise or link to GCA.  
18  
19

20  
21 *“jaw claudication is interesting, because I know at the time, my colleague and myself,*  
22  
23 *kind of, looked a bit more up about GCA and he said, ‘I’ve never heard of jaw*  
24  
25 *claudication.’ ”*  
26  
27

28 **GP15 (25, F, P)**  
29  
30  
31  
32  
33  
34

### 35 Fear of missing case of GCA

36  
37

38 GPs expressed considerable fear about missing a diagnosis of GCA given the potential for  
39  
40 irreversible visual loss.  
41  
42

43  
44 *“I find it, sort of, trickier, I think, to diagnose. I worry about it more. I worry about*  
45  
46 *missing it. And I feel far less confident about treating it. I think when I was first*  
47  
48 *qualified as a GP I think I thought somebody had got it every week. Anybody who’d*  
49  
50 *got a headache, you know”*  
51  
52

53  
54 **GP 24 (12, F, S)**  
55  
56  
57  
58  
59  
60

1  
2  
3 Fears surrounding missing a diagnosis of GCA also related to the potential for a wide range  
4  
5 of symptoms and atypical presentations.  
6  
7

8  
9 *“Just with a vague headache, and hadn’t had any visual disturbance at that point in*  
10  
11 *time. And he didn’t really have a lot of temporal artery tenderness. [.....] We did some*  
12  
13 *bloods at that point, and the ESR and CRP were normal [.....]... I wrote in the notes at*  
14  
15 *the time, ‘Excludes GCA’.....which, having read a bit more about it since, after this*  
16  
17 *happened, doesn’t totally exclude it.”*  
18  
19

20  
21 **GP 15 (25, F, P)**  
22  
23

## 24 25 26 27 28 **Management**

29  
30  
31 Two main themes were identified from the interview transcripts. First, initial and on-going  
32  
33 treatment and monitoring and second, referral for definitive diagnostic confirmation by a  
34  
35 specialist.  
36  
37  
38  
39  
40  
41

### 42 Initial and on-going treatment

43  
44  
45 Most participants indicated that they would initiate suspected GCA patients on appropriate  
46  
47 doses of prednisolone.  
48  
49

50  
51 *“I think the rheumatologists would say start the 60[mg] and I will see them in clinic.”*  
52  
53

54 **GP4 (6, M, P)**  
55  
56  
57  
58  
59  
60

1  
2  
3 However, there was recognition that treatment could impact on the sensitivity of the  
4  
5 temporal artery biopsy, especially if it was going to be delayed.  
6  
7

8  
9 *“what then happens in secondary care, it's less than ideal, they seem to rotate who*  
10  
11 *might do a temporal artery biopsy between vascular, ophthalmology and general*  
12  
13 *surgery [.....] but the patient generally is having that temporal biopsy before ever*  
14  
15 *seeing a rheumatologist and the timeliness of that temporal artery biopsy is not*  
16  
17 *ideal.”*  
18  
19

20  
21 **GP6 (20, F, P)**  
22  
23

24  
25  
26  
27 Local policy also had a significant impact on how suspected GCA patients were initially  
28  
29 treated. This, as well as concerns surrounding the impact that treatment could have on  
30  
31 biopsy effectiveness, may account for some of the significant number of participants who  
32  
33 indicated that they would not initiate treatment prior to referral.  
34  
35  
36

37  
38 *“Locally this gets referred to ophthalmology[.....] and our practice is actually within*  
39  
40 *the grounds of the hospital so we've got no issues really in terms of administering*  
41  
42 *steroids you know before they were seen, they would be seen within an hour by an*  
43  
44 *ophthalmologist.”*  
45  
46

47  
48 **GP 7 (10, M, P)**  
49  
50

51  
52  
53  
54 The principal and over-arching concern relating to long-term management was the potential  
55  
56 adverse effects of glucocorticoid treatment.  
57  
58  
59  
60

1  
2  
3 *“Well, it’s a good two years of treatment with steroids and all the complications and*  
4 *side effects that they carry with them. So, yes, and high doses of it, which have been*  
5 *poorly tolerated with the patients. [.....] One patient, she had diabetes, and she was*  
6 *started on the steroids, and she was struggling with awful side effects from the*  
7 *steroids. She developed, well, lots of depressive symptoms. Her blood sugars went all*  
8 *over the place. She got a lot of pitting oedema of the legs, which was hampering her*  
9 *mobility. She got unsteadiness due to the steroids.”*

10  
11  
12  
13  
14  
15  
16  
17  
18  
19  
20 **GP21 (7, F, S)**

21  
22  
23  
24  
25  
26  
27 Referral for definitive diagnostic confirmation by a specialist

28  
29  
30 Specialist referral for definitive diagnostic confirmation was a significant issue for GPs, with  
31 referral pathways being highly variable across the UK. The speciality to which suspected GCA  
32 patients were referred can depend on presenting clinical features; however, some of this  
33 variation reflects local policy and also the regional availability of services and specialities.

34  
35  
36  
37  
38  
39  
40 *“If their history was suspicious and their inflammatory markers were raised, I would*  
41 *then contact...well we’ve had this issue between rheumatology and ophthalmology*  
42 *and who to contact, and the line seems to be that if they’ve got any visual symptoms*  
43 *then they go to ophthalmology and if they haven’t then they go to rheumatology.”*

44  
45  
46  
47  
48  
49  
50 **GP13 (5, F, S)**

51  
52  
53 However, in some regions of the UK GPs reported that referral pathways were not clear and  
54 that specialist referral can be challenging.  
55  
56  
57  
58  
59  
60

1  
2  
3 *“But, generally, you speak to the on-call medical team, and they will advise me to*  
4 *speak to someone else. And then they advise me to speak to someone else. So you*  
5 *end up making loads of phone calls to try and find out which route you go in.”*  
6  
7  
8  
9

10  
11 **GP21 (7, F, S)**  
12

13  
14 Some participants reported that their local policy involved the GP requesting the temporal  
15 artery biopsy prior to review by a specialist. This often created challenges in itself.  
16  
17

18  
19 *“we would try and get a temporal artery biopsy fairly promptly. It has been a bit*  
20 *difficult in the past, and you know, you’re supposed to get it done within a day or two.*  
21 *We traipse round the ophthalmologists, who say, ‘No, speak to the vascular people.’*  
22 *Who say, ‘No, speak to the general surgeons.’ Well, we tried, initially, referring to the*  
23 *ophthalmologist, and they just aren’t keen at all [.....] at the moment we’ve had, a*  
24 *general surgery team who have done a temporal artery biopsy for us, and the*  
25 *vascular surgeons have.” GP15 (25, F, P)*  
26  
27  
28  
29  
30  
31  
32  
33  
34  
35  
36  
37  
38  
39

40 Further quotations illustrating the two main themes can be seen in Table 4 below.  
41  
42

43 **Table 4**  
44  
45  
46  
47  
48  
49  
50  
51  
52  
53  
54  
55  
56  
57  
58  
59  
60



## Discussion

This is the first study of its kind to explore diagnosis and a critical aspect of the care pathway for patients with suspected GCA. GCA remains a diagnosis that GPs worry about missing.

Whilst GPs were comfortable with classical presentation patterns, an overreliance on headache to trigger consideration of a diagnosis of GCA was evident, with some GPs having limited awareness of the full range of symptoms associated with GCA.

The predominant findings from the cross sectional study, suggest initiation of treatment for suspected GCA patients is not always routine. However a significant finding from both the cross sectional survey and qualitative interview study demonstrated that referral pathways across the UK vary greatly. Additionally GPs have significant concerns relating to treatment with long term glucocorticoids in this patient group, especially in conjunction with co-existing multi-morbidity.

## Recommendations

Early identification, referral and initiation of appropriate treatment for suspected GCA patients in general practice is critical to prevent complications such as irreversible visual loss<sup>1</sup>.

GPs responding to the survey seem to be over-relying on headache when diagnosing GCA. Given that almost half of patients do not present with a classical temporal headache and that 24% of patients with proven GCA have no headache symptoms at all<sup>16</sup>, excluding GCA on the basis of no headache has the potential to miss a significant proportion of patients with GCA. However symptoms like headache, are common<sup>17</sup> with over half of over 65 year

1  
2  
3 olds having had a headache in the previous 12 months,<sup>18</sup> yet serious pathology is rare in  
4  
5 general practice. Therefore the collective clinical picture needs to be considered and has to  
6  
7 include the full range of features of GCA.  
8  
9

10  
11 The group of patients with no headache are recognised to be at higher risk of permanent  
12  
13 visual loss as a result of delayed diagnosis<sup>4,19</sup>. Therefore, if alternative presentations are not  
14  
15 recognised by GPs they will continue to remain a high risk group. Educating clinicians about  
16  
17 other presenting symptoms and atypical presentations is essential to optimise diagnosis and  
18  
19 reduce delays in instigating appropriate treatment and referral, which could reduce the  
20  
21 potential for visual loss and serious long term complications for this patient group.  
22  
23

24  
25 A considerable proportion of GPs indicated that they would not initiate treatment prior to  
26  
27 referral for specialist review. From the questionnaire responses, current primary care  
28  
29 practice would seem to be in line with UK recommendations<sup>1</sup>, indicating that appropriate  
30  
31 doses of glucocorticoids, when given, are being prescribed at initiation. Additionally there  
32  
33 seems to be wide variation in practice across the UK relating to routes of referral and who  
34  
35 arranges and performs temporal artery biopsy. Rheumatology remains the predominant  
36  
37 speciality to whom GPs refer suspected GCA patients, but a range of different specialities  
38  
39 were identified by participants. These findings may in part reflect variations in local policy  
40  
41 and the availability of specialities regionally. However, it may also identify a lack of GP  
42  
43 awareness of current national GCA guidelines.  
44  
45  
46  
47  
48

49  
50 Research into conditions such as rheumatoid arthritis highlights that delays in diagnosis can  
51  
52 occur at several points in the patient journey. These include the patient recognising that  
53  
54 there is a problem requiring consultation (patient level), the patient then getting an  
55  
56 appointment with the GP, the GP recognising that referral is needed and making the referral  
57  
58  
59  
60

1  
2  
3 (GP delay) and the patient getting an appointment with the specialist (specialist delay) <sup>20</sup>.

4  
5 These points of delay are also likely to be relevant to patients with GCA. Health promotion  
6  
7 could be used to improve patients' awareness of GCA, but may be of limited value given the  
8  
9 rarity of the condition and the wide and non-specific symptoms that patients experience  
10  
11 early in the disease course. However, educational strategies for front line clinicians in the  
12  
13 early recognition and management of GCA is critical; although some responders indicated  
14  
15 that there do not appear to be robust fast track clinical pathways in their local region for  
16  
17 patients with suspected GCA . Given the relative rarity of GCA and variation in its early  
18  
19 presentation <sup>16</sup>, the potential for it not being recognised or for initial misdiagnosis is high. In  
20  
21 regions where temporal artery biopsy is arranged by the GP or undertaken before seeing the  
22  
23 relevant specialist, there is the possibility that a significant amount of unnecessary biopsies  
24  
25 are being performed especially given that there is a great burden of temporal artery biopsies  
26  
27 on surgical departments with sometimes low yield rates of positive biopsy <sup>21</sup>. This potentially  
28  
29 could be avoided if patients with suspected GCA were carefully selected by a clinician with  
30  
31 significant experience in diagnosing and identifying suspected GCA. No participants  
32  
33 discussed temporal artery ultrasound which can be used to help identify patients with GCA <sup>5</sup>.  
34  
35 Ultrasound techniques may be a preferred option for those with significant co-morbidities or  
36  
37 too frail to undergo biopsy. Additionally, it is less invasive and would be more appropriate to  
38  
39 being embedded in a care pathway for the rapid assessment of GCA in primary care to  
40  
41 streamline patient pathways to help reduce diagnostic confusion, or to better identify  
42  
43 patients for temporal artery biopsy <sup>22</sup> thereby improving outcomes for patients with GCA <sup>23</sup>,  
44  
45 <sup>24</sup>. Further studies are being conducted to determine whether availability and accuracy of  
46  
47 temporal artery ultrasound will alter requirements for biopsy <sup>25</sup>.  
48  
49  
50  
51  
52  
53  
54  
55  
56  
57  
58  
59  
60

1  
2  
3 Delays in assessment for definitive diagnosis creates several conundrums surrounding initial  
4  
5 treatment. Current guidance is clear that treatment should not be delayed and should be  
6  
7 initiated in patients with suspected GCA, although the sensitivity of temporal artery biopsy  
8  
9 declines the longer treatment has been given before biopsy <sup>26</sup>. Additionally the American  
10  
11 College of Rheumatology criteria for GCA suggests that a positive temporal artery biopsy is  
12  
13 not essential to diagnose GCA <sup>27</sup>. High dose glucocorticoid treatment may have a significant  
14  
15 impact on symptoms by the time they present to the reviewing specialist and therefore  
16  
17 definitive diagnosis for patients who have had a negative biopsy can become extremely  
18  
19 challenging. However, an accurate diagnosis is critical and a decision to delay treatment in  
20  
21 patients with true GCA could result in visual loss. Equally, a decision to continue treatment in  
22  
23 someone who does not truly have GCA will expose that patient to an inappropriate  
24  
25 treatment course (and therefore associated potential adverse effects) of glucocorticoids, as  
26  
27 treatment often continues for many patients, despite a negative temporal artery biopsy <sup>26</sup>.

28  
29 Our quantitative data suggested that over a third of participants would not initiate  
30  
31 treatment prior to referral despite UK national guidance which advises the immediate  
32  
33 initiation of high dose glucocorticoids <sup>1</sup>. This represents an area where further education to  
34  
35 encourage the immediate initiation of treatment could improve outcomes for patients with  
36  
37 GCA. However, not initiating treatment may be in part due to variations in local or practice  
38  
39 policy.  
40  
41  
42  
43  
44  
45  
46  
47  
48  
49  
50  
51  
52  
53  
54  
55  
56  
57  
58  
59  
60

### Strengths and limitations of this study

The predominant strength of this study is the use of a multi-methods approach, which has allowed the identification of significant challenges relating to GCA management in primary care and subsequent in depth exploration of those issues.

The main weakness in this study was the sub-optimal response rate and therefore the potential lack of generalisability of our findings. However a response rate of 25% is comparable to similar musculoskeletal GP surveys conducted in the same setting<sup>28</sup>. Additionally, while low response rates may increase the possibility of bias, responder demographics of the questionnaire study relating to age, gender and GP role were comparable to national GP demographics<sup>29</sup>. The standard limitations of telephone interviews also apply in this study. While such interviews enabled participants to be interviewed from a wide geographical area and therefore generate rich data on differing local management policies, they may reduce rapport and non-verbal communication. However, the questions used in the topic guide were highly clinical and therefore the lack of rapport building or visual cues is unlikely to have significantly impacted on data quality, as participants were not revealing personal details. TH undertook all of the qualitative data analysis which potentially could impact on theme development due to personal preconceptions and misinterpretations. However, an inter-rater analysis was undertaken to ensure concordance of themes identified. This did not show any difference between raters. Finally, there is the potential for discrepancies between reported behaviour and actual behaviour, this is inherent in both survey and interview studies.

## Conclusion

An increased focus on education and awareness of GCA (given its rarity and the range of presenting features) may aid better identification of potential GCA patients. However, significant challenges around GCA remain in primary care, some of which need to be addressed in conjunction with specialist settings. National guidelines suggest that GCA is a medical emergency and so treatment should not be delayed. However, as yet there are no UK national standardised fast track referral/care pathways enabling rapid referral of patients suspected of having GCA yet fast track pathways have been shown to potentially reduce the complication of sight loss in GCA<sup>23</sup>. This study identifies wide variations in the way that patients are initially managed across the UK and therefore adopting standardised fast track services for patients with suspected GCA could enable effective and accurate diagnosis and management and therefore improve outcomes for patients with GCA.

## **Acknowledgements**

TH is currently funded by an NIHR Clinical Lectureship in General Practice and was funded by an NIHR in practice fellowship and an NIHR School for Primary Care Research GP career progression award during the time that this research was undertaken. CDM is funded by the National Institute for Health Research (NIHR) Collaborations for Leadership in Applied Health Research and Care West Midlands, the NIHR School for Primary Care Research and an NIHR Research Professorship in General Practice (NIHR-RP-2014-04-026). The views and opinions expressed therein are those of the authors and do not necessarily reflect those of the NIHR (UK). The views expressed are those of the author(s) and not necessarily those of the NHS,

1  
2  
3 the NIHR or the Department of Health. We are grateful for the participation of all of the  
4  
5 General Practitioners who responded to the questionnaire and gave up their precious time  
6  
7 to participate in the telephone interviews. Special thanks go to Dr Antonia Middleditch and  
8  
9 Dr Edward Jutsum for their help in interview and topic guide development.  
10

11  
12 Acknowledgements are also given to the Research Institute for Primary Care and Health  
13  
14 Sciences, Keele University and the professional services staff who supported the study.  
15  
16

### 17 18 19 20 21 **Contributorship Statement**

22  
23  
24 Authors had access to all the study data, take responsibility for the accuracy of the analysis,  
25  
26 and had authority over the manuscript and the decision to submit for publication. Guarantor  
27  
28 of overall study integrity: TH & CDM. Study concept & design: TH, SM, SLH, JR & CDM. Data  
29  
30 collection and interpretation: TH, SM, SLH, JR & CDM. Analyses: TH, SM, SLH, JR & CDM.  
31  
32 Manuscript preparation: TH, SM, SLH, JAP JR & CDM. Final approval of manuscript: TH, SM,  
33  
34 SLH JAP, JR & CDM  
35  
36  
37  
38  
39  
40

### 41 **Conflicts of interest.**

42  
43  
44 We have no conflicts of interest to report.  
45  
46  
47  
48  
49  
50  
51  
52  
53  
54  
55  
56  
57  
58  
59  
60

## References

- 1) Dasgupta B, Giant Cell Arteritis Guideline Development Group. Concise guidance: diagnosis and management of giant cell arteritis. *Clin Med*. 2010;10(4):381-6.
- 2) Petri H, Nevitt A, Sarsour K, Napalkov P, Collinson N. Incidence of giant cell arteritis and characteristics of patients: data-driven analysis of comorbidities. *Arthritis Care Res (Hoboken)*. 2015;67(3):390-5
- 3) Barraclough K, Mallen CD, Helliwell T, Hider SL, Dasgupta B. Diagnosis and management of giant cell arteritis. *Br J Gen Pract*. 2012;62(599):329-30.
- 4) Ezeonyeji AN, Borg FA, Dasgupta B. Delays in recognition and management of giant cell arteritis: results from a retrospective audit. *Clin Rheumatol*. 2011;30(2):259-62.
- 5) Niederkohr RD, Levin LA. A Bayesian analysis of the true sensitivity of a temporal artery biopsy. *Invest Ophthalmol Vis Sci*. 2007;48(2):675-80.
- 6) Breuer GS, Neshet R, Neshet G. Negative temporal artery biopsies: eventual diagnoses and features of patients with biopsy-negative giant cell arteritis compared to patients without arteritis. *Clinical & Experimental Rheumatology*. 2008;26(6):1103-6.
- 7) Mohammad AJ, Englund M, Turesson C, Tomasson G, Merkel PA. Rate of Comorbidities in Giant Cell Arteritis: A Population-based Study. *J Rheumatol*. 2017;44(1):84-90
- 8) Creswell JW, Fetters MD, Ivankova NV. Designing a mixed methods study in primary care. *Ann Fam Med*. 2004;2(1):7-12.
- 9) Binleys.com
- 10) surveymonkey.com



- 1  
2  
3 11) IBM Corp. Released 2013. IBM SPSS Statistics for Windows, Version 22.0. Armonk,  
4  
5 NY: IBM Corp  
6  
7
- 8 12) Krippendorff K. Content analysis. In: Barbnouw E et al. International encyclopaedia of  
9  
10 communication. 1989; 403-407. New York, NY: Oxford University Press.  
11
- 12 13) <http://thetranscription.co.uk/>  
13
- 14 14) Braun V, Clarke V. Using thematic analysis in psychology. Qualitative Research in  
15  
16 Psychology. 2006;3(2), pp. 77-101.  
17
- 18 15) NVivo qualitative data analysis Software; QSR International Pty Ltd. Version 10, 2012  
19
- 20 16) Smetana GW, Shmerling RH. Does this patient have temporal arteritis? JAMA.  
21  
22 2002;287(1):92-101.  
23
- 24 17) Boardman HF, Thomas E, Milson DS, Croft PR. One-year follow-up of headache in an  
25  
26 adult general population. Headache. 2005;45(4):337-345.  
27
- 28 18) Prencipe M, Casini AR, Ferretti C, Santini M, Pezzella F, Scaldaferrri N, Culosso F.,  
29  
30 Prevalence of headache in an elderly population: attack frequency, disability, and use  
31  
32 of medication. Journal of neurology, neurosurgery, and psychiatry. 2001;70(3):377-  
33  
34 381.  
35
- 36 19) Prior JA, Ranjbar H, Belcher J, Mackie SL, Helliwell T, Liddle J, et al. Diagnostic delay  
37  
38 for giant cell arteritis - a systematic review and meta-analysis. BMC Med. 2017 Jun  
39  
40 28;15(1):120,017-0871-z.  
41
- 42 20) Raza K, Stack R, Kumar K, Filer A, Detert J, Bastian H, et al. Delays in assessment of  
43  
44 patients with rheumatoid arthritis: variations across Europe. Ann Rheum Dis.  
45  
46 2011;70(10):1822-5.  
47
- 48 21) Cristaudo AT, Mizumoto R, Hendahewa R. The impact of temporal artery biopsy on  
49  
50 surgical practice. Ann Med Surg (Lond). 2016 ;11:47-51.  
51  
52  
53  
54  
55  
56  
57  
58  
59  
60

- 1  
2  
3 22) Ball EL, Walsh SR, Tang TY, Gohil R, Clarke JM. Role of ultrasonography in the  
4  
5 diagnosis of temporal arteritis. *Br J Surg*. 2010;97(12):1765-71.  
6  
7  
8 23) Patil P, Williams M, Maw WW, Achilleos K, Elsideeg S, Dejaco C, et al. Fast track  
9  
10 pathway reduces sight loss in giant cell arteritis: results of a longitudinal  
11  
12 observational cohort study. *Clin Exp Rheumatol*. 2015;33(2 Suppl 89):S,103-6.  
13  
14  
15 24) Diamantopoulos AP, Haugeberg G, Lindland A, Myklebust G. The fast-track  
16  
17 ultrasound clinic for early diagnosis of giant cell arteritis significantly reduces  
18  
19 permanent visual impairment: towards a more effective strategy to improve clinical  
20  
21 outcome in giant cell arteritis? *Rheumatology (Oxford)*. 2016;55(1):66-70.  
22  
23  
24 25) Luqmani R, Lee E, Singh S, Gillett M, Schmidt WA, Bradburn M, et al. The Role of  
25  
26 Ultrasound Compared to Biopsy of Temporal Arteries in the Diagnosis and Treatment  
27  
28 of Giant Cell Arteritis (TABUL): a diagnostic accuracy and cost-effectiveness study.  
29  
30 *Health Technol Assess*. 2016;20(90):1-238.  
31  
32  
33 26) Pieri A, Milligan R, Hegde V, Hennessy C. Temporal artery biopsy: are we doing it  
34  
35 right? *Int J Health Care Qual Assur*. 2013;26(6):559-63.  
36  
37  
38 27) Hunder GG, Bloch DA, Michel BA, Stevens MB, Arend WP, Calabrese LH, et al. The  
39  
40 American College of Rheumatology 1990 criteria for the classification of giant cell  
41  
42 arteritis. *Arthritis Rheum*. 1990;33(8):1122-8  
43  
44  
45 28) Clarson LE, Nicholl BI, Bishop A, Edwards JJ, Daniel R, Mallen CD. Monitoring  
46  
47 Osteoarthritis: A Cross-sectional Survey in General Practice. *Clin Med Insights*  
48  
49 *Arthritis Musculoskelet Disord*. 2013;6:85-91.  
50  
51  
52 29) <http://content.digital.nhs.uk/>  
53  
54  
55  
56  
57  
58  
59  
60

1  
2  
3  
4  
5  
6  
7  
8  
9  
10  
11  
12  
13  
14  
15  
16  
17  
18  
19  
20  
21  
22  
23  
24  
25  
26  
27  
28  
29  
30  
31  
32  
33  
34  
35  
36  
37  
38  
39  
40  
41  
42  
43  
44  
45  
46  
47  
48  
49  
50  
51  
52  
53  
54  
55  
56  
57  
58  
59  
60

Table 1 Table demonstrating the features used by responders to identify GCA

| GCA Feature            | Theme Frequency |
|------------------------|-----------------|
| Headache/Head Symptoms | 1071            |
| Visual disturbances    | 671             |
| Scalp Tenderness       | 468             |
| Jaw Symptoms           | 420             |
| PMR symptoms           | 69              |
| Systemic Symptoms      | 65              |
| Fatigue                | 29              |
| Joint/Muscle symptoms  | 20              |
| Tongue symptoms        | 12              |

Table 2. Actions undertaken by GPs with patients with suspected GCA

| Action                                                                                                    | n   | (%)  |
|-----------------------------------------------------------------------------------------------------------|-----|------|
| Urgent blood tests, initiate treatment and refer for out-patient review urgently, if blood tests positive | 554 | 44.4 |
| Refer to hospital immediately without investigation                                                       | 244 | 19.5 |
| Urgent blood tests and refer to hospital immediately if positive                                          | 201 | 16.1 |
| Urgent blood tests, initiate treatment and refer for out-patients review routinely                        | 66  | 5.3  |

1  
2  
3  
4  
5  
6  
7  
8  
9  
10  
11  
12  
13  
14  
15  
16  
17  
18  
19  
20  
21  
22  
23  
24  
25  
26  
27  
28  
29  
30  
31  
32  
33  
34  
35  
36  
37  
38  
39  
40  
41  
42  
43  
44  
45  
46  
47  
48  
49  
50  
51  
52  
53  
54  
55  
56  
57  
58  
59  
60

Table 3 Specialties to which GCA patients are referred

| Speciality             | Frequency | (%)  |
|------------------------|-----------|------|
| Rheumatology           | 478       | 38.3 |
| Ophthalmology          | 366       | 29.3 |
| General Medicine       | 144       | 11.5 |
| Accident and Emergency | 35        | 2.8  |
| Neurology              | 12        | 1.0  |
| Elderly Care           | 9         | 0.7  |
| Other                  | 41        | 3.3  |
| Missing                | 164       | 13.1 |

Table 4. Verbatim quotations from the qualitative study and open responses from the cross-sectional survey

| Theme                   | Sub-theme                                         | Verbatim quotation                                                                                                                                                                                                                                                                                                                                                                                                                                                                                                                                                                                                                                                                                                                                                                                                                                                                                          |
|-------------------------|---------------------------------------------------|-------------------------------------------------------------------------------------------------------------------------------------------------------------------------------------------------------------------------------------------------------------------------------------------------------------------------------------------------------------------------------------------------------------------------------------------------------------------------------------------------------------------------------------------------------------------------------------------------------------------------------------------------------------------------------------------------------------------------------------------------------------------------------------------------------------------------------------------------------------------------------------------------------------|
| Challenges of diagnosis | Fear of Missing GCA and non-specific presentation | <p>“an elderly lady who was having headaches and kind of pain around her eyes and I’m trying to think what other symptoms she had, general misery really. And it sort of came and went and came and went and she didn’t really have any visual problems which is good and when you said to her, “Does it hurt to chew?” she’d say, “Oh yes I think it does”. And so yes all of that so in the end I started, I did discuss it with our local physicians because just in that situation where you don’t want to miss it but on the other hand it doesn’t seem like it’s probably the most likely diagnosis. And we got as far as them saying, “Well if it’s maybe a possibility then go ahead and treat with steroids”, at which point she said, “No I’m feeling much better thank you”. And that was that until she started complaining about it again another few months later”</p> <p>GP17 (11, F, P)</p> |
| Initial and on-going    | Starting treatment                                | <p>“And, certainly, in the past couple of years, we’ve started them on steroids first, because, kind of, getting anybody</p>                                                                                                                                                                                                                                                                                                                                                                                                                                                                                                                                                                                                                                                                                                                                                                                |

---

1  
2  
3 treatment to see them quickly, you know, within a day or two, not  
4  
5 and been possible, which doesn't seem very ideal to me. And  
6  
7 monitoring we've taken the view if it turns out to be wrong, we can  
8  
9 stop it, but if we don't start it, there might be a problem  
10  
11 before they get the biopsy. So that's, kind of, what we've  
12  
13 done here."  
14

15  
16  
17 GP15 (25, F, P)  
18  
19

20  
21  
22 "Yes again just I think in terms of the ongoing  
23  
24 management really because my experience with another  
25  
26 patient, the one that ended up with visual disturbance,  
27  
28 she sort of then fell between ophthalmology and  
29  
30 rheumatology without either necessarily taking full  
31  
32 responsibility for her and actually she was a patient of a  
33  
34 partner of mine so he was kind of following her up but his  
35  
36 experience was that he was piggy in the middle really"  
37  
38  
39

40  
41 GP 6 (20, F, P)  
42  
43

44  
45 Expediency "you refer them under a two-week wait, and it's not that  
46  
47 of review much of an emergency, whereas we all thought you  
48  
49 referred them acutely, because it was that much of an  
50  
51 emergency. So there was a big discrepancy of views  
52  
53 between what we felt we'd been taught about it, and  
54  
55  
56  
57

---

---

what other people were now doing.”

GP23 (12, F, S)

“I know we, kind of, all get it drummed into us, you know, we should all get these things sent in on the day. But I think, well, one of them was hanging round for a year, and he didn’t really come to any harm, except undue pain and distress that he had. And the other one was hanging round for a couple of months, you know. And they were both proved – as I say, I’m turning the clock back 15 years - but I think they were both proven to be temporal arteritis. It maybe isn’t that, kind of, you know, you must get them in on the day, as I thought as a medical student, you know”

GP22 (15, M, P)

|                                                                                      |                                         |                                                                                                                                                                                                                                                                                                                     |
|--------------------------------------------------------------------------------------|-----------------------------------------|---------------------------------------------------------------------------------------------------------------------------------------------------------------------------------------------------------------------------------------------------------------------------------------------------------------------|
| <p>Challenges with referral for definitive diagnostic confirmation by specialist</p> | <p>Delays in temporal artery biopsy</p> | <p>“The patient that I referred on the NHS, she ended up having a biopsy before she saw a consultant rheumatologist. So, yes, it was done that way round. The biopsy, of course, came back negative because the two week delay before getting it done meant the steroids had treated it.” <b>GP21 (7, F, S)</b></p> |
|--------------------------------------------------------------------------------------|-----------------------------------------|---------------------------------------------------------------------------------------------------------------------------------------------------------------------------------------------------------------------------------------------------------------------------------------------------------------------|

“Local issue regarding whether ophthalmology or vascular

---



1  
2  
3  
4  
5  
6  
7  
8  
9  
10  
11  
12  
13  
14  
15  
16  
17  
18  
19  
20  
21  
22  
23  
24  
25  
26  
27  
28  
29  
30  
31  
32  
33  
34  
35  
36  
37  
38  
39  
40  
41  
42  
43  
44  
45  
46  
47  
48  
49  
50  
51  
52  
53  
54  
55  
56  
57  
58  
59  
60

---

surgery will perform temporal artery biopsy, reliability of  
this procedure and steroid response whilst waiting for the  
biopsy”

Participant 2506 (4, 2, P)

---

Key to participant demographic: GP (n) (qualitative study identifier), Participant (n) (survey identifier) [time qualified as a GP (years), gender (Male/Female), seniority/role (S:salaried, L:locum, P:partner)]

For peer review only

# BMJ Open

## The challenges of diagnosis and management of giant cell arteritis in general practice: a multi-methods study

|                                 |                                                                                                                                                                                                                                                                                                                                                                                                                                                                                                                        |
|---------------------------------|------------------------------------------------------------------------------------------------------------------------------------------------------------------------------------------------------------------------------------------------------------------------------------------------------------------------------------------------------------------------------------------------------------------------------------------------------------------------------------------------------------------------|
| Journal:                        | <i>BMJ Open</i>                                                                                                                                                                                                                                                                                                                                                                                                                                                                                                        |
| Manuscript ID                   | bmjopen-2017-019320.R1                                                                                                                                                                                                                                                                                                                                                                                                                                                                                                 |
| Article Type:                   | Research                                                                                                                                                                                                                                                                                                                                                                                                                                                                                                               |
| Date Submitted by the Author:   | 02-Nov-2017                                                                                                                                                                                                                                                                                                                                                                                                                                                                                                            |
| Complete List of Authors:       | Helliwell, Toby; Keele University, Research Institute for Primary Care and Health Sciences<br>Muller, Sara; Keele University, Research Institute for Primary Care & Health Sciences<br>Hider, Samantha; Keele University, Arthritis Research UK Primary Care Centre;<br>Prior, James A.; Keele Univ, Research Institute for Primary Care and Health Sciences<br>Richardson, Jane; Keele University, Primary Care and Health Sciences<br>Mallen, Christian; Keele University, Arthritis Research UK Primary Care Centre |
| <b>Primary Subject Heading</b>: | General practice / Family practice                                                                                                                                                                                                                                                                                                                                                                                                                                                                                     |
| Secondary Subject Heading:      | Rheumatology, Medical management                                                                                                                                                                                                                                                                                                                                                                                                                                                                                       |
| Keywords:                       | PRIMARY CARE, RHEUMATOLOGY, GERIATRIC MEDICINE                                                                                                                                                                                                                                                                                                                                                                                                                                                                         |
|                                 |                                                                                                                                                                                                                                                                                                                                                                                                                                                                                                                        |

SCHOLARONE™  
Manuscripts

1  
2  
3  
4  
5 **The challenges of diagnosis and management of giant cell arteritis in general practice: a multi-**  
6 **methods study**  
7  
8  
9

10 1Toby Helliwell PhD, 1Sara Muller PhD, 1,2 Samantha L Hider PhD, 1 James A Prior PhD, 1 Jane C  
11 Richardson PhD, 1 Christian D Mallen PhD  
12

13 1Arthritis Research UK Primary Care Centre, Primary Care Sciences, Keele University, Keele  
14 Staffordshire ST5 5BG  
15

16 2Rheumatology Department, Haywood Rheumatology Centre, Staffordshire ST6 7AG  
17  
18  
19

20 **Address for correspondence:**  
21

22 Dr Toby Helliwell. Arthritis Research UK Primary Care Centre, Primary Care Sciences, Keele University,  
23 Keele Staffordshire ST5 5BG.  
24

25 Email address: t.helliwell@keele.ac.uk  
26

27 **Funding:** This work was funded by an Arthritis Research UK Clinician Scientist Award awarded to  
28 Christian Mallen (19634). CDM is funded by the National Institute for Health Research (NIHR),  
29 Collaborations for Leadership in Applied Health Research and Care West Midlands, the NIHR School  
30 for Primary Care Research and a NIHR Research Professorship in General Practice (NIHR-RP-2014-04-  
31 026). TH is funded by a NIHR Clinical Lectureship in General Practice. JAP is funded by a Launching  
32 Fellowship from the NIHR School for Primary Care Research. The views expressed are those of the  
33 author(s) and not necessarily those of the NHS, the NIHR or the Department of Health.  
34  
35

36 **Data sharing statement:** The datasets analysed during the current study may be available from the  
37 corresponding author on reasonable request.  
38  
39

40 **Keywords:** Giant cell arteritis, general practice, diagnosis, management  
41

42 **Conflicts of interest:** There are no conflicts of interest to declare.  
43

44 **Prior presentation:** Presented as a poster at BSR Conference 2015  
45

46 Word count: 3940  
47

48 Number of tables: 4  
49  
50  
51  
52  
53  
54  
55  
56  
57  
58  
59  
60

1  
2  
3  
4  
5  
6  
7 Background: In the UK, general practitioners (GPs) are usually the first medical contact for  
8 patients with suspected giant cell arteritis (GCA). Whilst rare, it is critical not to miss, as  
9 delayed treatment can lead to significant complications including permanent visual loss. To  
10 date little is known about the approach and challenges to diagnosis and management of GCA  
11 by GPs.  
12  
13  
14  
15  
16  
17  
18

19 Objective: To investigate the diagnosis and management of patients with suspected GCA in  
20 UK general practice.  
21  
22  
23

24 Design and participants: A multi-methods approach was taken, comprising a postal survey of  
25 5000 randomly selected UK GPs and semi-structured telephone interviews of 24 GPs from  
26 across the UK.  
27  
28  
29  
30  
31

32 Setting: UK general practice  
33  
34

35 Results: 1249 questionnaires were returned. 879 responders (70%) indicated that they had  
36 diagnosed and managed a patient with GCA. A variety of clinical features were used to  
37 identify GCA. 21.9% suggested that they would exclude GCA as a diagnosis if headache was  
38 absent and around one third do not routinely initiate glucocorticoid treatment prior to  
39 referral. Significant regional variations in referral pathways were reported. Thematic analysis  
40 of interview transcripts highlighted fears relating to a missed diagnosis of GCA and the non-  
41 specific nature of early GCA presentation. Accessing specialist care was highlighted as  
42 challenging by many GPs and that a national standard fast track pathway is lacking to  
43 support this patient group. Additionally there were significant concerns regarding potential  
44 adverse effects relating to long term treatment with glucocorticoids.  
45  
46  
47  
48  
49  
50  
51  
52  
53  
54  
55  
56  
57  
58  
59  
60

1  
2  
3 Conclusion: GPs appear to over-rely on headache to identify GCA and marked geographical  
4  
5 differences in management, with conflicting referral pathways and difficulties in accessing  
6  
7 appropriate services exist in the UK. A national standard for fast-tracking suspected GCA  
8  
9 patients to relevant specialists would be beneficial to improve care and outcomes for  
10  
11 patients with GCA.  
12  
13  
14  
15  
16  
17  
18  
19

### 20 **Strengths**

- 21 1. Multi-methods approach, allowing the identification of significant challenges relating to GCA
- 22 management in primary care and subsequent in depth exploration of those issues.
- 23 2. First large study to investigate diagnosis and management of GCA in general practice
- 24
- 25
- 26
- 27

### 28 **Limitations**

- 29 1. Sub-optimal response rate and therefore potential lack of generalisability of findings
- 30 although responder demographics of the questionnaire study relating to age, gender and GP
- 31 role were comparable to national GP demographics.
- 32 2. Telephone interviews often viewed as inferior to face to face interviews for qualitative
- 33 studies
- 34 3. There is the potential for discrepancies between reported behaviour and actual behaviour,
- 35 this is inherent in both survey and interview studies
- 36
- 37
- 38
- 39
- 40
- 41
- 42
- 43
- 44
- 45
- 46
- 47
- 48
- 49
- 50
- 51
- 52
- 53
- 54
- 55
- 56
- 57
- 58
- 59
- 60

## Background

Giant cell arteritis (GCA) is the most common large/medium vessel vasculitis<sup>1</sup>. It is strongly associated with polymyalgia rheumatica (PMR) with an estimated incidence of 1.0 per 10000 patient years<sup>2</sup>. Barraclough (2012) estimated that a full-time general practitioner (GP) will see one new case of GCA every 1-2 years, although this will greatly depend on practice population demographics<sup>3</sup>.

Classical presenting features of GCA include new onset headache or head pain (which may be unilateral and often temporal), scalp tenderness, jaw and tongue claudication, constitutional and visual symptoms<sup>1</sup>. Usually there is a significant inflammatory response with raised inflammatory markers. However, it can present atypically which may lead to delays in diagnosis and potentially irreversible complications such as sight loss<sup>4</sup>. Once GCA is suspected, treatment with high dose glucocorticoids (often prednisolone in the UK) should be initiated along with early specialist referral to confirm diagnosis and prevent potential disease complications<sup>1</sup>.

Suspected GCA patients are usually identified clinically, followed by specialist referral for temporal artery biopsy (TAB) to confirm diagnosis. Ultrasound scanning however has been shown to be a useful and non-invasive tool to help diagnose GCA<sup>5</sup> although typical ultrasound features of GCA may diminish after just a few days of glucocorticoid treatment, whereas histological features of GCA may still be evident on TAB several months after initiation of treatment<sup>6</sup>. However, the sensitivity of TAB can vary with 13% to 19% of patients with typical features of GCA having a negative temporal artery biopsy<sup>7</sup>.

1  
2  
3 In the UK, GPs are the first point of medical contact for most patients. The role of the GP  
4  
5 involves maintaining a high index of suspicion for the disorder, to initiate early therapy and  
6  
7 urgently refer to an appropriate specialist for diagnostic confirmation<sup>1</sup>. Following diagnosis,  
8  
9 GPs are often key in tapering glucocorticoid treatment as well as monitoring and  
10  
11 management of glucocorticoid related adverse effects and impact on co-morbidity for  
12  
13 example osteoporosis, cardiovascular disease, diabetes and development of serious  
14  
15 infections<sup>2,8</sup>.

16  
17  
18  
19 The aim of this study was to investigate the diagnostic challenges and initial and on-going  
20  
21 management of GCA patients by GPs in the UK.  
22  
23  
24  
25  
26  
27

## 28 **Materials and Methods**

29  
30  
31 Given the potential variation in management practices due to multiple influences, such as  
32  
33 patient presentation, multi-morbidity, availability of services and variations in practice and  
34  
35 local policy, a multi-methods approach combining two study methodologies was chosen to  
36  
37 produce a more complete overall description of current GP diagnostic and management  
38  
39 practices for GCA<sup>9</sup>. First, a national cross-sectional postal survey of 5000 randomly selected  
40  
41 UK GPs was undertaken to investigate PMR and its closely associated illness of GCA, followed  
42  
43 by a semi-structured telephone interview study with a purposive sample of survey  
44  
45 responders to investigate in depth the challenges of diagnosis and management associated  
46  
47 with GCA and PMR. The cross-sectional postal survey was undertaken first, with the findings  
48  
49 used to help develop the topic guide for the interview study. This paper presents the  
50  
51 combined findings from the two studies relating to GCA.  
52  
53  
54  
55  
56  
57  
58  
59  
60

1  
2  
3 PMR national cross sectional postal questionnaire survey. A cross sectional survey was  
4  
5 mailed to a random sample of 5000 GPs from across the UK identified from the Binley's  
6  
7 database. The Binley's database contains the names and addresses of the majority of GPs  
8  
9 working in the UK. It also contains other forms of information including the type of practice,  
10  
11 the practice population size, practitioner seniority, and some of the clinical services  
12  
13 provided<sup>10</sup>. An online option for survey completion was also available through Survey  
14  
15 Monkey<sup>11</sup>. Non-responders were sent a reminder card after 2 weeks and a further survey  
16  
17 pack after 4 weeks. The survey was closed 6 weeks after the second survey pack was sent.  
18  
19  
20  
21  
22 No standard survey instrument exists for assessing diagnosis and management of GCA by  
23  
24 GPs and so questions were specifically developed using current literature and guidelines for  
25  
26 GCA<sup>1</sup>. Questions related to how diagnosis was made (signs and symptoms) and how the GP  
27  
28 managed patients with suspected GCA. A mixture of open and closed response questions  
29  
30 were used. The questionnaire was piloted amongst GPs, rheumatologists and patients.  
31  
32  
33  
34 Descriptive statistics were generated (mean, standard deviation (SD) and interquartile range  
35  
36 (IQR)) using the statistical analysis package SPSS 22 for closed response questions<sup>12</sup>. For  
37  
38 open response questions a thematic content analysis was used<sup>13</sup>.

39  
40  
41  
42  
43  
44  
45 The interview study. Participants in the interview study were purposively sampled from  
46  
47 responders to the GP survey who had agreed to further contact. To reflect as broad a range  
48  
49 of practitioner experience as possible, sampling was based on clinical experience, gender  
50  
51 and clinical seniority. The qualitative interview study topic guide which was used as a guide  
52  
53 for topics to discuss, was informed by findings from the cross-sectional survey and relevant  
54  
55  
56  
57  
58  
59  
60



1  
2  
3 GCA literature. The topic guide was reviewed and refined with feedback from GPs,  
4  
5 rheumatologists and qualitative researchers. As transcripts were reviewed, the topic guide  
6  
7 was modified to focus on themes identified from early interviews. The topic guide was  
8  
9 piloted with two GPs and refined within the research team. These interviews were not  
10  
11 included in the data analysis.  
12  
13

14  
15 Interviews were audio recorded and transcribed verbatim using an approved transcription  
16  
17 company<sup>14</sup>. The resulting transcripts were screened to remove any identifying information.  
18  
19 Thematic analysis, as described by Braun and Clarke, was used to analyse resulting transcript  
20  
21 data<sup>15</sup>. Analysis of the transcripts was managed using NVivo (NVivo10)<sup>16</sup>. TH performed the  
22  
23 analysis and an inter-rater exercise was undertaken in which three other researchers (SM,  
24  
25 SH, JR) were asked to independently analyse and identify general themes relating to a  
26  
27 randomly selected interview to compare with findings by TH. No changes resulted from this  
28  
29 exercise. Ethical approval for both studies was granted by the Keele University ethics review  
30  
31 panel (qualitative study ERP178, survey ERP2206).  
32  
33  
34  
35  
36  
37  
38  
39

## 40 **Results**

41  
42 1249 (25%) completed questionnaires were received and analysed. 879 (70%) GPs had  
43  
44 indicated that they had managed a patient with GCA. Responders to the survey had a mean  
45  
46 age of 44 years (SD 9.25) and a mean of 13.5 years since qualifying as a GP. 52% were female  
47  
48 and the majority were partners (74%), with salaried (21%) and locum GPs (3%) comprising  
49  
50 the remainder. For the qualitative study, 24 GP participants were telephone interviewed  
51  
52  
53  
54  
55  
56  
57  
58  
59  
60

1  
2  
3 from various regions across the UK. 16 participants were female and 15 participants were GP  
4  
5 partners.  
6  
7  
8  
9

### 10 11 Questionnaire survey: Initial diagnosis and management 12

13  
14 Free text open response questions in the questionnaire were used to ask all participants to  
15  
16 describe how they made a diagnosis of GCA. The results summarised in Table 1.  
17  
18

#### 19 20 **Table 1** 21

22  
23 The predominant reported clinical feature used to diagnose GCA was headache, along with  
24  
25 visual disturbance and scalp tenderness. Survey responders indicated that they often used a  
26  
27 combination of features when making a new diagnosis. Of particular note however, was that  
28  
29 21.9% of responders indicated that they only use headache to identify GCA.  
30  
31

32  
33 Management of GCA can be divided into i) initial treatment and referral and ii) long term  
34  
35 glucocorticoid reduction and monitoring. For GPs, initial management is intimately  
36  
37 associated with diagnosis as suspected GCA patients require urgent specialist referral for  
38  
39 definitive diagnosis and treatment. Table 2 summarises the immediate subsequent actions  
40  
41 of GPs who have identified patients with suspected GCA.  
42  
43  
44

#### 45 46 **Table 2** 47 48 49 50

51  
52 Guidance advises that treatment should not be delayed and that appropriate urgent referral  
53  
54 for specialist diagnostic confirmation should be made<sup>1</sup>. 445 responders to the survey  
55  
56 (35.6%) indicated that they would not routinely initiate glucocorticoid treatment prior to  
57  
58  
59  
60

1  
2  
3 referral. However, 78.7% (n=983) reported that if they were to initiate treatment,  
4  
5 appropriate doses of between 40 and 60mg of prednisolone would be prescribed. GP  
6  
7 responders indicated that they were referring suspected GCA patients to a variety of  
8  
9 different specialities using an assortment of referral pathways, depending on the  
10  
11 geographical location in the UK. Table 3 summarises to which speciality survey responders  
12  
13 refer suspected GCA patients.  
14  
15

### 16 17 **Table 3**

#### 18 19 20 21 22 23 Themes identified from the qualitative study

##### 24 25 26 **Diagnosis**

27  
28  
29 The two main themes identified from the interview study related firstly to the presenting  
30  
31 features of GCA and secondly to fears of missing a diagnosis of GCA.  
32  
33  
34  
35  
36  
37

##### 38 39 Presenting features of GCA

40  
41  
42 When asked about GCA symptoms in the interviews, participants often gave textbook  
43  
44 descriptions of classical features of GCA.  
45  
46

47 *“Headache in someone over 55 you think giant cell arteritis really, that's my mantra,*  
48 *new different headache, classically unilateral but not always, focused around the*  
49 *temple, potentially some tenderness there, possibly protruding temporal artery,*  
50 *classically tender when they're combing their hair, but also looking for things like*  
51  
52  
53  
54  
55  
56  
57  
58  
59  
60

1  
2  
3 *jaw claudication or tongue symptoms, [.....] and obviously the dread of visual*  
4  
5 *disturbance as well really which can be anything really”*  
6  
7

8 **GP6 (20, F, P)**  
9

10  
11 Key: GP identifier [time qualified as a GP (years), gender (male/female), seniority/role

12  
13 (S:salaried, L:locum, P:partner, SP: senior partner)]  
14  
15

16  
17  
18  
19  
20  
21  
22  
23 While textbook descriptions of classical GCA were given, there was recognition that some of  
24  
25 these features may be difficult to recognise or link to GCA.  
26  
27

28  
29 *“jaw claudication is interesting, because I know at the time, my colleague and myself,*  
30  
31 *kind of, looked a bit more up about GCA and he said, ‘I’ve never heard of jaw*  
32  
33 *claudication.’ ”*  
34  
35

36 **GP15 (25, F, P)**  
37  
38  
39  
40  
41  
42  
43

#### 44 Fear of missing case of GCA

45  
46 GPs expressed considerable fear about missing a diagnosis of GCA given the potential for  
47  
48 irreversible visual loss.  
49  
50

51 *“I find it, sort of, trickier, I think, to diagnose. I worry about it more. I worry about*  
52  
53 *missing it. And I feel far less confident about treating it. I think when I was first*  
54  
55  
56  
57  
58  
59

1  
2  
3 *qualified as a GP I think I thought somebody had got it every week. Anybody who'd*  
4  
5 *got a headache, you know"*  
6  
7

8 **GP 24 (12, F, S)**  
9

10  
11  
12  
13  
14  
15 Fears surrounding missing a diagnosis of GCA also related to the potential for a wide range  
16  
17 of symptoms and atypical presentations.  
18

19  
20 *"Just with a vague headache, and hadn't had any visual disturbance at that point in*  
21  
22 *time. And he didn't really have a lot of temporal artery tenderness. [.....] We did some*  
23  
24 *bloods at that point, and the ESR and CRP were normal [.....]... I wrote in the notes at*  
25  
26 *the time, 'Excludes GCA'.....which, having read a bit more about it since, after this*  
27  
28 *happened, doesn't totally exclude it."*  
29  
30

31  
32  
33 **GP 15 (25, F, P)**  
34  
35  
36  
37  
38

39 **Management**  
40

41  
42 Two main themes were identified from the interview transcripts. First, initial and on-going  
43  
44 treatment and monitoring and second, referral for definitive diagnostic confirmation by a  
45  
46 specialist.  
47  
48  
49  
50  
51  
52  
53  
54  
55  
56  
57  
58  
59  
60

### Initial and on-going treatment

Most participants indicated that they would initiate suspected GCA patients on appropriate doses of prednisolone.

*"I think the rheumatologists would say start the 60[mg] and I will see them in clinic."*

#### **GP4 (6, M, P)**

However, there was recognition that treatment could impact on the sensitivity of the temporal artery biopsy, especially if it was going to be delayed.

*"what then happens in secondary care, it's less than ideal, they seem to rotate who might do a temporal artery biopsy between vascular, ophthalmology and general surgery [.....] but the patient generally is having that temporal biopsy before ever seeing a rheumatologist and the timeliness of that temporal artery biopsy is not ideal."*

#### **GP6 (20, F, P)**

Local policy also had a significant impact on how suspected GCA patients were initially treated. This, as well as concerns surrounding the impact that treatment could have on biopsy effectiveness, may account for some of the significant number of participants who indicated that they would not initiate treatment prior to referral.

1  
2  
3 *“Locally this gets referred to ophthalmology[.....] and our practice is actually within*  
4 *the grounds of the hospital so we’ve got no issues really in terms of administering*  
5 *steroids you know before they were seen, they would be seen within an hour by an*  
6 *ophthalmologist.”*

11  
12  
13 **GP 7 (10, M, P)**

14  
15  
16  
17  
18  
19 The principal and over-arching concern relating to long-term management was the potential  
20 adverse effects of glucocorticoid treatment.

21  
22  
23  
24 *“Well, it’s a good two years of treatment with steroids and all the complications and*  
25 *side effects that they carry with them. So, yes, and high doses of it, which have been*  
26 *poorly tolerated with the patients. [.....] One patient, she had diabetes, and she was*  
27 *started on the steroids, and she was struggling with awful side effects from the*  
28 *steroids. She developed, well, lots of depressive symptoms. Her blood sugars went all*  
29 *over the place. She got a lot of pitting oedema of the legs, which was hampering her*  
30 *mobility. She got unsteadiness due to the steroids.”*

31  
32  
33  
34  
35  
36  
37  
38  
39  
40  
41 **GP21 (7, F, S)**

42  
43  
44  
45  
46  
47 Referral for definitive diagnostic confirmation by a specialist

48  
49  
50 Specialist referral for definitive diagnostic confirmation was a significant issue for GPs, with  
51 referral pathways being highly variable across the UK. The speciality to which suspected GCA  
52  
53  
54  
55  
56  
57  
58  
59  
60

1  
2  
3 patients were referred can depend on presenting clinical features; however, some of this  
4  
5 variation reflects local policy and also the regional availability of services and specialities.  
6  
7

8 *“If their history was suspicious and their inflammatory markers were raised, I would*  
9 *then contact...well we’ve had this issue between rheumatology and ophthalmology*  
10 *and who to contact, and the line seems to be that if they’ve got any visual symptoms*  
11 *then they go to ophthalmology and if they haven’t then they go to rheumatology.”*  
12  
13  
14  
15  
16  
17

18 **GP13 (5, F, S)**  
19

20  
21 However, in some regions of the UK GPs reported that referral pathways were not clear and  
22  
23 that specialist referral can be challenging.  
24  
25

26 *“But, generally, you speak to the on-call medical team, and they will advise me to*  
27 *speak to someone else. And then they advise me to speak to someone else. So you*  
28 *end up making loads of phone calls to try and find out which route you go in.”*  
29  
30  
31  
32  
33

34 **GP21 (7, F, S)**  
35

36  
37 Some participants reported that their local policy involved the GP requesting the temporal  
38  
39 artery biopsy prior to review by a specialist. This often created challenges in itself.  
40  
41

42 *“we would try and get a temporal artery biopsy fairly promptly. It has been a bit*  
43 *difficult in the past, and you know, you’re supposed to get it done within a day or two.*  
44 *We traipse round the ophthalmologists, who say, ‘No, speak to the vascular people.’*  
45 *Who say, ‘No, speak to the general surgeons.’ Well, we tried, initially, referring to the*  
46 *ophthalmologist, and they just aren’t keen at all [.....] at the moment we’ve had, a*  
47  
48  
49  
50  
51  
52  
53  
54  
55  
56  
57  
58  
59  
60



1  
2  
3 *general surgery team who have done a temporal artery biopsy for us, and the*  
4  
5 *vascular surgeons have.” GP15 (25, F, P)*  
6  
7  
8  
9

10  
11 Further quotations illustrating the two main themes can be seen in Table 4 below.  
12  
13

#### 14 **Table 4**

15  
16  
17  
18  
19

#### 20 **Discussion**

21  
22

23 This is the first study of its kind to explore diagnosis and a critical aspect of the care pathway  
24 for patients with suspected GCA. GCA remains a diagnosis that GPs worry about missing.  
25  
26

27 Whilst GPs were comfortable with classical presentation patterns, an overreliance on  
28 headache to trigger consideration of a diagnosis of GCA was evident, with some GPs having  
29 limited awareness of the full range of symptoms associated with GCA.  
30  
31  
32  
33

34 The predominant findings from the cross sectional study, suggest initiation of treatment for  
35 suspected GCA patients is not always routine. However a significant finding from both the  
36 cross sectional survey and qualitative interview study demonstrated that referral pathways  
37 across the UK vary greatly. Additionally GPs have significant concerns relating to treatment  
38 with long term glucocorticoids in this patient group, especially in conjunction with co-  
39 existing multi-morbidity.  
40  
41  
42  
43  
44  
45  
46  
47  
48  
49  
50  
51  
52  
53  
54  
55  
56  
57  
58  
59  
60

## Recommendations

Early identification, referral and initiation of appropriate treatment for suspected GCA patients in general practice is critical to prevent complications such as irreversible visual loss<sup>1</sup>.

GPs responding to the survey seem to be over-relying on headache when diagnosing GCA. Given that almost half of patients do not present with a classical temporal headache and that 24% of patients with proven GCA have no headache symptoms at all<sup>17</sup>, excluding GCA on the basis of no headache has the potential to miss a significant proportion of patients with GCA. However symptoms like headache, are common<sup>18</sup> with over half of over 65 year olds having had a headache in the previous 12 months,<sup>19</sup> yet serious pathology is rare in general practice. Therefore the collective clinical picture needs to be considered and has to include the full range of features of GCA.

The group of patients with no headache are recognised to be at higher risk of permanent visual loss as a result of delayed diagnosis<sup>4,20</sup>. Therefore, if alternative presentations are not recognised by GPs they will continue to remain a high risk group. Educating clinicians about other presenting symptoms and atypical presentations is essential to optimise diagnosis and reduce delays in instigating appropriate treatment and referral, which could reduce the potential for visual loss and serious long term complications for this patient group.

A considerable proportion of GPs indicated that they would not initiate treatment prior to referral for specialist review. From the questionnaire responses, current primary care practice would seem to be in line with UK recommendations<sup>1</sup>, indicating that appropriate doses of glucocorticoids, when given, are being prescribed at initiation. Additionally there

1  
2  
3 seems to be wide variation in practice across the UK relating to routes of referral and who  
4  
5 arranges and performs temporal artery biopsy. Rheumatology remains the predominant  
6  
7 speciality to whom GPs refer suspected GCA patients, but a range of different specialities  
8  
9 were identified by participants. These findings may in part reflect variations in local policy  
10  
11 and the availability of specialities regionally. However, it may also identify a lack of GP  
12  
13 awareness of current national GCA guidelines.  
14  
15

16  
17 Research into conditions such as rheumatoid arthritis highlights that delays in diagnosis can  
18  
19 occur at several points in the patient journey. These include the patient recognising that  
20  
21 there is a problem requiring consultation (patient level), the patient then getting an  
22  
23 appointment with the GP, the GP recognising that referral is needed and making the referral  
24  
25 (GP delay) and the patient getting an appointment with the specialist (specialist delay)<sup>21</sup>.  
26  
27

28  
29 These points of delay are also likely to be relevant to patients with GCA. Health promotion  
30  
31 could be used to improve patients' awareness of GCA, but may be of limited value given the  
32  
33 rarity of the condition and the wide and non-specific symptoms that patients experience  
34  
35 early in the disease course. However, educational strategies for front line clinicians in the  
36  
37 early recognition and management of GCA is critical; although some responders indicated  
38  
39 that there do not appear to be robust fast track clinical pathways in their local region for  
40  
41 patients with suspected GCA . Given the relative rarity of GCA and variation in its early  
42  
43 presentation<sup>17</sup>, the potential for it not being recognised or for initial misdiagnosis is high. In  
44  
45 regions where temporal artery biopsy is arranged by the GP or undertaken before seeing the  
46  
47 relevant specialist, there is the possibility that a significant amount of unnecessary biopsies  
48  
49 are being performed especially given that there is a great burden of temporal artery biopsies  
50  
51 on surgical departments with sometimes low yield rates of positive biopsy<sup>22</sup>. This potentially  
52  
53 could be avoided if patients with suspected GCA were carefully selected by a clinician with  
54  
55  
56  
57  
58  
59  
60

1  
2  
3 significant experience in diagnosing and identifying suspected GCA. No participants  
4  
5 discussed temporal artery ultrasound which can be used to help identify patients with GCA<sup>5</sup>  
6  
7 and this may be because this imaging modality where available, is requested by the treating  
8  
9 specialist and not the GP. Ultrasound techniques may be a preferred option for those with  
10  
11 significant co-morbidities or too frail to undergo biopsy but will have to be rapidly available  
12  
13 to clinicians given the importance of starting glucocorticoid treatment in GCA and the rapid  
14  
15 effects treatment has on typical ultrasound features<sup>6</sup>. It is however, less invasive and could  
16  
17 be appropriate to being embedded in a care pathway for the rapid assessment of GCA in  
18  
19 primary care to streamline patient pathways to help reduce diagnostic confusion, or to  
20  
21 better identify patients for temporal artery biopsy<sup>23</sup> thereby improving outcomes for  
22  
23 patients with GCA<sup>24,25</sup>. Further studies are being conducted to determine whether  
24  
25 availability and accuracy of temporal artery ultrasound will alter requirements for biopsy<sup>26</sup>.  
26  
27  
28 Delays in assessment for definitive diagnosis creates several conundrums surrounding initial  
29  
30 treatment. Current guidance is clear that treatment should not be delayed and should be  
31  
32 initiated in patients with suspected GCA, although the sensitivity of temporal artery biopsy  
33  
34 declines the longer treatment has been given before biopsy<sup>27</sup>. High dose glucocorticoid  
35  
36 treatment may have a significant impact on symptoms by the time they present to the  
37  
38 reviewing specialist and therefore definitive diagnosis for patients who have had a negative  
39  
40 biopsy can become extremely challenging. However, an accurate diagnosis is critical and a  
41  
42 decision to delay treatment in patients with true GCA could result in visual loss. Equally, a  
43  
44 decision to continue treatment in someone who does not truly have GCA will expose that  
45  
46 patient to an inappropriate treatment course (and therefore associated potential adverse  
47  
48 effects) of glucocorticoids, as treatment often continues for many patients, despite a  
49  
50 negative temporal artery biopsy<sup>27</sup>.  
51  
52  
53  
54  
55  
56  
57  
58  
59  
60

1  
2  
3 Our quantitative data suggested that over a third of participants would not initiate  
4  
5 treatment prior to referral despite UK national guidance which advises the immediate  
6  
7 initiation of high dose glucocorticoids<sup>1</sup>. This represents an area where further education to  
8  
9 encourage the immediate initiation of treatment could improve outcomes for patients with  
10  
11 GCA. However, not initiating treatment may be in part due to variations in local or practice  
12  
13 policy.  
14  
15

### 16 17 18 19 20 Strengths and limitations of this study 21

22  
23 The predominant strength of this study is the use of a multi-methods approach, which has  
24  
25 allowed the identification of significant challenges relating to GCA management in primary  
26  
27 care and subsequent in depth exploration of those issues.  
28  
29

30  
31 The main weakness in this study was the sub-optimal response rate and therefore the  
32  
33 potential lack of generalisability of our findings. However a response rate of 25% is  
34  
35 comparable to similar musculoskeletal GP surveys conducted in the same setting<sup>28</sup>.  
36  
37 Additionally, while low response rates may increase the possibility of bias, responder  
38  
39 demographics of the questionnaire study relating to age, gender and GP role were  
40  
41 comparable to national GP demographics<sup>29</sup>. The standard limitations of telephone  
42  
43 interviews also apply in this study. While such interviews enabled participants to be  
44  
45 interviewed from a wide geographical area and therefore generate rich data on differing  
46  
47 local management policies, they may reduce rapport and non-verbal communication.  
48  
49 However, the questions used in the topic guide were highly clinical and therefore the lack of  
50  
51 rapport building or visual cues is unlikely to have significantly impacted on data quality, as  
52  
53 participants were not revealing personal details. TH undertook all of the qualitative data  
54  
55  
56  
57  
58  
59  
60

1  
2  
3 analysis which potentially could impact on theme development due to personal  
4  
5 preconceptions and misinterpretations. However, an inter-rater analysis was undertaken to  
6  
7 ensure concordance of themes identified. This did not show any difference between raters.  
8  
9 Finally, there is the potential for discrepancies between reported behaviour and actual  
10  
11 behaviour, this is inherent in both survey and interview studies.  
12  
13  
14  
15  
16  
17

### 18 Conclusion

19  
20  
21 An increased focus on education and awareness of GCA (given its rarity and the range of  
22  
23 presenting features including more subtle features such as limb claudication, constitutional  
24  
25 symptoms, vascular bruits, asymmetry of pulses and or blood pressure, anaemia<sup>1</sup>) may aid  
26  
27 better identification of potential GCA patients. However, significant challenges around GCA  
28  
29 remain in primary care, some of which need to be addressed in conjunction with specialist  
30  
31 settings. National guidelines suggest that GCA is a medical emergency and so treatment  
32  
33 should not be delayed. However, as yet there are no UK national standardised fast track  
34  
35 referral/care pathways enabling rapid referral of patients suspected of having GCA yet fast  
36  
37 track pathways have been shown to potentially reduce the complication of sight loss in GCA  
38  
39 <sup>24</sup>. This study identifies wide variations in the way that patients are initially managed across  
40  
41 the UK and therefore adopting standardised fast track services for patients with suspected  
42  
43 GCA could enable effective and accurate diagnosis and management and therefore improve  
44  
45 outcomes for patients with GCA.  
46  
47  
48  
49

### 50 **Acknowledgements**

1  
2  
3 TH is currently funded by an NIHR Clinical Lectureship in General Practice and was funded by  
4  
5 an NIHR in practice fellowship and an NIHR School for Primary Care Research GP career  
6  
7 progression award during the time that this research was undertaken. CDM is funded by the  
8  
9 National Institute for Health Research (NIHR) Collaborations for Leadership in Applied Health  
10  
11 Research and Care West Midlands, the NIHR School for Primary Care Research and an NIHR  
12  
13 Research Professorship in General Practice (NIHR-RP-2014-04-026). The views and opinions  
14  
15 expressed therein are those of the authors and do not necessarily reflect those of the NIHR  
16  
17 (UK). The views expressed are those of the author(s) and not necessarily those of the NHS,  
18  
19 the NIHR or the Department of Health. We are grateful for the participation of all of the  
20  
21 General Practitioners who responded to the questionnaire and gave up their precious time  
22  
23 to participate in the telephone interviews. Special thanks go to Dr Antonia Middleditch and  
24  
25 Dr Edward Jutsum for their help in interview and topic guide development.  
26  
27  
28 Acknowledgements are also given to the Research Institute for Primary Care and Health  
29  
30 Sciences, Keele University and the professional services staff who supported the study.  
31  
32  
33  
34  
35  
36  
37  
38

### 39 **Contributorship Statement**

40  
41 Authors had access to all the study data, take responsibility for the accuracy of the analysis,  
42  
43 and had authority over the manuscript and the decision to submit for publication. Guarantor  
44  
45 of overall study integrity: TH & CDM. Study concept & design: TH, SM, SLH, JR & CDM. Data  
46  
47 collection and interpretation: TH, SM, SLH, JR & CDM. Analyses: TH, SM, SLH, JR & CDM.  
48  
49 Manuscript preparation: TH, SM, SLH, JAP JR & CDM. Final approval of manuscript: TH, SM,  
50  
51  
52  
53 SLH JAP, JR & CDM  
54  
55  
56  
57  
58  
59  
60

### Conflicts of interest.

We have no conflicts of interest to report.

### References

- 1) Dasgupta B, Giant Cell Arteritis Guideline Development Group. BSR and BHPR guidelines for the management of giant cell arteritis. *Rheumatology* 2010;49(8):1594–1597
- 2) Petri H, Nevitt A, Sarsour K, Napalkov P, Collinson N. Incidence of giant cell arteritis and characteristics of patients: data-driven analysis of comorbidities. *Arthritis Care Res (Hoboken)*. 2015;67(3):390-5
- 3) Barraclough K, Mallen CD, Helliwell T, Hider SL, Dasgupta B. Diagnosis and management of giant cell arteritis. *Br J Gen Pract*. 2012;62(599):329-30.
- 4) Ezeonyeji AN, Borg FA, Dasgupta B. Delays in recognition and management of giant cell arteritis: results from a retrospective audit. *Clin Rheumatol*. 2011;30(2):259-62.
- 5) Niederkohr RD, Levin LA. A Bayesian analysis of the true sensitivity of a temporal artery biopsy. *Invest Ophthalmol Vis Sci*. 2007;48(2):675-80.
- 6) Schmidt WA. Role of ultrasound in the understanding and management of vasculitis. *Ther Adv Musculoskelet Dis*. 2014;6(2):39–47.
- 7) Breuer GS, Neshet R, Neshet G. Negative temporal artery biopsies: eventual diagnoses and features of patients with biopsy-negative giant cell arteritis compared to patients without arteritis. *Clinical & Experimental Rheumatology*. 2008;26(6):1103-6.



- 1
- 2
- 3 8) Mohammad AJ, Englund M, Turesson C, Tomasson G, Merkel PA. Rate of
- 4
- 5 Comorbidities in Giant Cell Arteritis: A Population-based Study. *J Rheumatol*.
- 6
- 7 2017;44(1):84-90
- 8
- 9
- 10 9) Creswell JW, Fetters MD, Ivankova NV. Designing a mixed methods study in primary
- 11
- 12 care. *Ann Fam Med*. 2004;2(1):7-12.
- 13
- 14 10) Binleys.com
- 15
- 16 11) surveymonkey.com
- 17
- 18 12) IBM Corp. Released 2013. IBM SPSS Statistics for Windows, Version 22.0. Armonk,
- 19
- 20 NY: IBM Corp
- 21
- 22 13) Krippendorff K. Content analysis. In: Barbnouw E et al. International encyclopaedia of
- 23
- 24 communication. 1989; 403-407. New York, NY: Oxford University Press.
- 25
- 26 14) <http://thetranscription.co.uk/>
- 27
- 28
- 29 15) Braun V, Clarke V. Using thematic analysis in psychology. *Qualitative Research in*
- 30
- 31 *Psychology*. 2006;3(2), pp. 77-101.
- 32
- 33 16) NVivo qualitative data analysis Software; QSR International Pty Ltd. Version 10, 2012
- 34
- 35 17) Smetana GW, Shmerling RH. Does this patient have temporal arteritis? *JAMA*.
- 36
- 37 2002;287(1):92-101.
- 38
- 39
- 40 18) Boardman HF, Thomas E, Milson DS, Croft PR. One-year follow-up of headache in an
- 41
- 42 adult general population. *Headache*. 2005;45(4):337-345.
- 43
- 44 19) Prencipe M, Casini AR, Ferretti C, Santini M, Pezzella F, Scaldaferrri N, Culosso F,.
- 45
- 46 Prevalence of headache in an elderly population: attack frequency, disability, and use
- 47
- 48 of medication. *Journal of neurology, neurosurgery, and psychiatry*. 2001;70(3):377-
- 49
- 50 381.
- 51
- 52
- 53
- 54
- 55
- 56
- 57
- 58
- 59
- 60

- 1  
2  
3 20) Prior JA, Ranjbar H, Belcher J, Mackie SL, Helliwell T, Liddle J, et al. Diagnostic delay  
4  
5 for giant cell arteritis - a systematic review and meta-analysis. *BMC Med*. 2017 Jun  
6  
7 28;15(1):120,017-0871-z.  
8  
9  
10 21) Raza K, Stack R, Kumar K, Filer A, Detert J, Bastian H, et al. Delays in assessment of  
11  
12 patients with rheumatoid arthritis: variations across Europe. *Ann Rheum Dis*.  
13  
14 2011;70(10):1822-5.  
15  
16 22) Cristaudo AT, Mizumoto R, Hendahewa R. The impact of temporal artery biopsy on  
17  
18 surgical practice. *Ann Med Surg (Lond)*. 2016 ;11:47-51.  
19  
20  
21 23) Ball EL, Walsh SR, Tang TY, Gohil R, Clarke JM. Role of ultrasonography in the  
22  
23 diagnosis of temporal arteritis. *Br J Surg*. 2010;97(12):1765-71.  
24  
25  
26 24) Patil P, Williams M, Maw WW, Achilleos K, Elsideeg S, Dejacó C, et al. Fast track  
27  
28 pathway reduces sight loss in giant cell arteritis: results of a longitudinal  
29  
30 observational cohort study. *Clin Exp Rheumatol*. 2015;33(2 Suppl 89):S,103-6.  
31  
32  
33 25) Diamantopoulos AP, Haugeberg G, Lindland A, Myklebust G. The fast-track  
34  
35 ultrasound clinic for early diagnosis of giant cell arteritis significantly reduces  
36  
37 permanent visual impairment: towards a more effective strategy to improve clinical  
38  
39 outcome in giant cell arteritis? *Rheumatology (Oxford)*. 2016;55(1):66-70.  
40  
41  
42 26) Luqmani R, Lee E, Singh S, Gillett M, Schmidt WA, Bradburn M, et al. The Role of  
43  
44 Ultrasound Compared to Biopsy of Temporal Arteries in the Diagnosis and Treatment  
45  
46 of Giant Cell Arteritis (TABUL): a diagnostic accuracy and cost-effectiveness study.  
47  
48 *Health Technol Assess*. 2016;20(90):1-238.  
49  
50  
51 27) Pieri A, Milligan R, Hegde V, Hennessy C. Temporal artery biopsy: are we doing it  
52  
53 right? *Int J Health Care Qual Assur*. 2013;26(6):559-63.  
54  
55  
56  
57  
58  
59  
60

- 1  
2  
3 28) Clarson LE, Nicholl BI, Bishop A, Edwards JJ, Daniel R, Mallen CD. Monitoring  
4  
5 Osteoarthritis: A Cross-sectional Survey in General Practice. Clin Med Insights  
6  
7 Arthritis Musculoskelet Disord. 2013;6:85-91.  
8  
9  
10 29) NHS Digital [Internet]. UK national information, data and IT systems for health and care  
11  
12 services [cited 2017 Aug 25]. Available from: <http://digital.nhs.uk/catalogue/PUB21772>  
13  
14  
15  
16  
17  
18  
19  
20  
21  
22  
23  
24  
25  
26  
27  
28  
29  
30  
31  
32  
33  
34  
35  
36  
37  
38  
39  
40  
41  
42  
43  
44  
45  
46  
47  
48  
49  
50  
51  
52  
53  
54  
55  
56  
57  
58  
59  
60

Table 1 Table demonstrating the features used by responders to identify GCA

| <b>GCA Feature</b>                           | <b>Theme Frequency</b> |
|----------------------------------------------|------------------------|
| Headache/Head Symptoms                       | 1071                   |
| Visual disturbances                          | 671                    |
| Scalp (including temporal artery tenderness) | 468                    |
| Jaw Symptoms                                 | 420                    |
| PMR symptoms                                 | 69                     |
| Systemic Symptoms                            | 65                     |
| Fatigue                                      | 29                     |
| Joint/Muscle symptoms                        | 20                     |
| Tongue symptoms                              | 12                     |

Table 2. Actions undertaken by GPs with patients with suspected GCA

| Action                                                                                                    | n   | (%)  |
|-----------------------------------------------------------------------------------------------------------|-----|------|
| Urgent blood tests, initiate treatment and refer for out-patient review urgently, if blood tests positive | 554 | 44.4 |
| Refer to hospital immediately without investigation                                                       | 244 | 19.5 |
| Urgent blood tests and refer to hospital immediately if positive                                          | 201 | 16.1 |
| Urgent blood tests, initiate treatment and refer for out-patients review routinely                        | 66  | 5.3  |

Table 3 Specialties to which GCA patients are referred

| Speciality             | Frequency | (%)  |
|------------------------|-----------|------|
| Rheumatology           | 478       | 38.3 |
| Ophthalmology          | 366       | 29.3 |
| General Medicine       | 144       | 11.5 |
| Accident and Emergency | 35        | 2.8  |
| Neurology              | 12        | 1.0  |
| Elderly Care           | 9         | 0.7  |
| Other                  | 41        | 3.3  |
| Missing                | 164       | 13.1 |

Table 4. Verbatim quotations from the qualitative study and open responses from the cross-sectional survey

| Theme                              | Sub-theme                                         | Verbatim quotation                                                                                                                                                                                                                                                                                                                                                                                                                                                                                                                                                                                                                                                                                                                                                                                                                                                                                          |
|------------------------------------|---------------------------------------------------|-------------------------------------------------------------------------------------------------------------------------------------------------------------------------------------------------------------------------------------------------------------------------------------------------------------------------------------------------------------------------------------------------------------------------------------------------------------------------------------------------------------------------------------------------------------------------------------------------------------------------------------------------------------------------------------------------------------------------------------------------------------------------------------------------------------------------------------------------------------------------------------------------------------|
| Challenges of diagnosis            | Fear of Missing GCA and non-specific presentation | <p>“an elderly lady who was having headaches and kind of pain around her eyes and I’m trying to think what other symptoms she had, general misery really. And it sort of came and went and came and went and she didn’t really have any visual problems which is good and when you said to her, “Does it hurt to chew?” she’d say, “Oh yes I think it does”. And so yes all of that so in the end I started, I did discuss it with our local physicians because just in that situation where you don’t want to miss it but on the other hand it doesn’t seem like it’s probably the most likely diagnosis. And we got as far as them saying, “Well if it’s maybe a possibility then go ahead and treat with steroids”, at which point she said, “No I’m feeling much better thank you”. And that was that until she started complaining about it again another few months later”</p> <p>GP17 (11, F, P)</p> |
| Initial and on-going treatment and | Starting treatment                                | <p>“And, certainly, in the past couple of years, we’ve started them on steroids first, because, kind of, getting anybody to see them quickly, you know, within a day or two, not been possible, which doesn’t seem very ideal to me. And</p>                                                                                                                                                                                                                                                                                                                                                                                                                                                                                                                                                                                                                                                                |

1  
2  
3 monitoring we've taken the view if it turns out to be wrong, we can  
4  
5 stop it, but if we don't start it, there might be a problem  
6  
7 before they get the biopsy. So that's, kind of, what we've  
8  
9 done here."

10  
11  
12 GP15 (25, F, P)  
13  
14  
15

16  
17 "Yes again just I think in terms of the ongoing  
18  
19 management really because my experience with another  
20  
21 patient, the one that ended up with visual disturbance,  
22  
23 she sort of then fell between ophthalmology and  
24  
25 rheumatology without either necessarily taking full  
26  
27 responsibility for her and actually she was a patient of a  
28  
29 partner of mine so he was kind of following her up but his  
30  
31 experience was that he was piggy in the middle really"  
32  
33

34  
35 GP 6 (20, F, P)  
36  
37  
38

39 Expediency "you refer them under a two-week wait, and it's not that  
40  
41 of review much of an emergency, whereas we all thought you  
42  
43 referred them acutely, because it was that much of an  
44  
45 emergency. So there was a big discrepancy of views  
46  
47 between what we felt we'd been taught about it, and  
48  
49 what other people were now doing."  
50  
51

52  
53 GP23 (12, F, S)  
54  
55  
56  
57  
58  
59  
60



---

1  
2  
3  
4  
5 “I know we, kind of, all get it drummed into us, you know,  
6  
7 we should all get these things sent in on the day. But I  
8  
9 think, well, one of them was hanging round for a year, and  
10  
11 he didn’t really come to any harm, except undue pain and  
12  
13 distress that he had. And the other one was hanging round  
14  
15 for a couple of months, you know. And they were both  
16  
17 proved – as I say, I’m turning the clock back 15 years - but  
18  
19 I think they were both proven to be temporal arteritis. It  
20  
21 maybe isn’t that, kind of, you know, you must get them in  
22  
23 on the day, as I thought as a medical student, you know”  
24  
25  
26  
27

28 GP22 (15, M, P)  
29  
30  
31

|                                                                                                                                   |                                                                 |                                                                                                                                                                                                                                                                                                                                                           |
|-----------------------------------------------------------------------------------------------------------------------------------|-----------------------------------------------------------------|-----------------------------------------------------------------------------------------------------------------------------------------------------------------------------------------------------------------------------------------------------------------------------------------------------------------------------------------------------------|
| <p>32<br/>33 Challenges<br/>34 with referral<br/>35 for definitive<br/>36 diagnostic<br/>37 confirmation<br/>38 by specialist</p> | <p>33 Delays in<br/>34 temporal<br/>35 artery<br/>36 biopsy</p> | <p>33 “The patient that I referred on the NHS, she ended up<br/>34 having a biopsy before she saw a consultant<br/>35 rheumatologist. So, yes, it was done that way round. The<br/>36 biopsy, of course, came back negative because the two<br/>37 week delay before getting it done meant the steroids had<br/>38 treated it.” <b>GP21 (7, F, S)</b></p> |
|-----------------------------------------------------------------------------------------------------------------------------------|-----------------------------------------------------------------|-----------------------------------------------------------------------------------------------------------------------------------------------------------------------------------------------------------------------------------------------------------------------------------------------------------------------------------------------------------|

39  
40  
41  
42  
43  
44  
45  
46  
47  
48  
49 “Local issue regarding whether ophthalmology or vascular  
50  
51 surgery will perform temporal artery biopsy, reliability of  
52  
53 this procedure and steroid response whilst waiting for the  
54  
55

---

---

biopsy”

Participant 2506 (4, 2, P)

---

Key to participant demographic: GP (n) (qualitative study identifier), Participant (n) (survey identifier) [time qualified as a GP (years), gender (Male/Female), seniority/role (S:salaried, L:locum, P:partner)]

For peer review only
